# Supplementary material
Source: PubMed Central journal article supplement (PMC3286645)
Supplement: NIHMS343829-supplement-01.pdf [file NIHMS343829-supplement-01.pdf]

# Synthesis, Thermal Properties and Cytotoxicity Evaluation of Hydrocarbon and Fluorocarbon Alkyl $\beta$ -D-xylopyranoside Surfactants

## SUPPORTING MATERIAL

Wenjin Xu,<sup>a</sup> Gifty Osei-Prempeh,<sup>b</sup> Fresia C. Lema Herrera,<sup>c</sup> E. Davis Oldham,<sup>a</sup> Renato J. Aguilera,<sup>c</sup> Sean Parkin,<sup>d</sup> Stephen E. Rankin,<sup>e</sup> Barbara L. Knutson,<sup>e</sup> and Hans-Joachim Lehmler<sup>\*,a</sup>

<sup>a</sup> Department of Occupational and Environmental Health, The University of Iowa, UI Research Park, 124 IREH, Iowa City, IA 52242, USA; <sup>b</sup> Department of Chemical Engineering, WVU Institute of Technology, 405 Fayette Pike, Montgomery, WV 25136, USA; <sup>c</sup> Department of Biological Sciences, Biosciences Research Building, University of Texas at El Paso, 500 West University Ave., El Paso, TX 79968, USA; <sup>d</sup> Department of Chemistry, University of Kentucky, Lexington, KY 40506-0055, USA; <sup>e</sup> Department of Chemical and Materials Engineering, University of Kentucky, 177 F.P. Anderson Tower, Lexington, KY 40506, USA.

\*Corresponding author:  
Hans-Joachim Lehmler  
The University of Iowa  
Department of Occupational and Environmental Health  
University of Iowa Research Park, 221 IREH  
Iowa City, IA 52242-5000  
Phone: 1(319) 335-4211  
Fax: 1(319) 335-4290  
e-mail: [hans-joachim-lehmler@uiowa.edu](mailto:hans-joachim-lehmler@uiowa.edu)

## Table of Content

|                                                                                                               |    |
|---------------------------------------------------------------------------------------------------------------|----|
| <b>Figure S1.</b> $^1\text{H}$ NMR spectrum of compound <b>8a</b> in $\text{CDCl}_3$ .                        | 4  |
| <b>Figure S2.</b> $^{13}\text{C}$ NMR spectrum of compound <b>8a</b> in $\text{CDCl}_3$ .                     | 4  |
| <b>Figure S3.</b> $^1\text{H}$ NMR spectrum (300 MHz) of compound <b>8b</b> in $\text{CDCl}_3$ .              | 5  |
| <b>Figure S4.</b> $^{13}\text{C}$ NMR spectrum (75 MHz) of compound <b>8b</b> in $\text{CDCl}_3$ .            | 5  |
| <b>Figure S5.</b> $^1\text{H}$ NMR spectrum (400 MHz) of compound <b>8c</b> in $\text{CDCl}_3$ .              | 6  |
| <b>Figure S6.</b> $^{13}\text{C}$ NMR spectrum (100 MHz) of compound <b>8c</b> in $\text{CDCl}_3$ .           | 6  |
| <b>Figure S7.</b> $^1\text{H}$ NMR spectrum (400 MHz) of compound <b>8d</b> in $\text{CDCl}_3$ .              | 7  |
| <b>Figure S8.</b> $^{13}\text{C}$ NMR spectrum (100 MHz) of compound <b>8d</b> in $\text{CDCl}_3$ .           | 7  |
| <b>Figure S9.</b> $^1\text{H}$ NMR spectrum (400 MHz) of compound <b>8e</b> in $\text{CDCl}_3$ .              | 8  |
| <b>Figure S10.</b> $^{13}\text{C}$ NMR spectrum (100 MHz) of compound <b>8e</b> in $\text{CDCl}_3$ .          | 8  |
| <b>Figure S11.</b> $^1\text{H}$ NMR spectrum (400 MHz) of compound <b>8f</b> in $\text{CDCl}_3$ .             | 9  |
| <b>Figure S12.</b> $^{13}\text{C}$ NMR spectrum (100 MHz) of compound <b>8f</b> in $\text{CDCl}_3$ .          | 9  |
| <b>Figure S13.</b> $^1\text{H}$ NMR spectrum (400 MHz) of compound <b>8g</b> in $\text{CDCl}_3$ .             | 10 |
| <b>Figure S14.</b> $^{13}\text{C}$ NMR spectrum (100 MHz) of compound <b>8g</b> in $\text{CDCl}_3$ .          | 10 |
| <b>Figure S15.</b> $^1\text{H}$ NMR spectrum (282 MHz) of compound <b>9a</b> in $\text{d}_4\text{-MeOH}$ .    | 11 |
| <b>Figure S16.</b> $^{13}\text{C}$ NMR spectrum (400 MHz) of compound <b>9a</b> in $\text{d}_4\text{-MeOH}$ . | 11 |
| <b>Figure S17.</b> $^1\text{H}$ NMR spectrum (300 MHz) of compound <b>9b</b> in $\text{d}_4\text{-MeOH}$ .    | 12 |
| <b>Figure S18.</b> $^{13}\text{C}$ NMR spectrum (100 MHz) of compound <b>9b</b> in $\text{d}_4\text{-MeOH}$ . | 12 |
| <b>Figure S19.</b> $^1\text{H}$ NMR spectrum (400 MHz) of compound <b>9c</b> in $\text{d}_4\text{-MeOH}$ .    | 13 |
| <b>Figure S20.</b> $^{13}\text{C}$ NMR spectrum (100 MHz) of compound <b>9c</b> in $\text{d}_4\text{-MeOH}$ . | 13 |
| <b>Figure S21.</b> $^1\text{H}$ NMR spectrum (400 MHz) of compound <b>9d</b> in $\text{d}_4\text{-MeOH}$ .    | 14 |
| <b>Figure S22.</b> $^{13}\text{C}$ NMR spectrum (100 MHz) of compound <b>9d</b> in $\text{d}_4\text{-MeOH}$ . | 14 |
| <b>Figure S23.</b> $^1\text{H}$ NMR spectrum (400 MHz) of compound <b>9e</b> in $\text{d}_4\text{-MeOH}$ .    | 15 |
| <b>Figure S24.</b> $^{13}\text{C}$ NMR spectrum (100 MHz) of compound <b>9e</b> in $\text{d}_4\text{-MeOH}$ . | 15 |
| <b>Figure S25.</b> $^1\text{H}$ NMR spectrum (400 MHz) of compound <b>9f</b> in $\text{d}_4\text{-MeOH}$ .    | 16 |
| <b>Figure S26.</b> $^{13}\text{C}$ NMR spectrum (100 MHz) of compound <b>9f</b> in $\text{d}_4\text{-MeOH}$ . | 16 |
| <b>Figure S27.</b> $^1\text{H}$ NMR spectrum (400 MHz) of compound <b>9g</b> in $\text{d}_4\text{-MeOH}$ .    | 17 |
| <b>Figure S28.</b> $^{13}\text{C}$ NMR spectrum (100 MHz) of compound <b>9g</b> in $\text{d}_4\text{-MeOH}$ . | 17 |

|                                                                                                                                                                                 |    |
|---------------------------------------------------------------------------------------------------------------------------------------------------------------------------------|----|
| <b>Figure S29.</b> COSY spectrum of compound <b>10</b> in CDCl <sub>3</sub> .                                                                                                   | 18 |
| <b>Table S1.</b> Crystal data and structure refinement for decyl β-D-xylopyranoside ( <b>9c</b> ).                                                                              | 19 |
| <b>Table S2.</b> Selected bond lengths and angles for decyl β-D-xylopyranoside ( <b>9c</b> ).                                                                                   | 20 |
| <b>Figure S30.</b> Alternating bilayers of hydrophilic xyloside groups and hydrophobic decyl groups formed parallel to the a-b plane by decyl β-D-xylopyranoside ( <b>9c</b> ). | 21 |

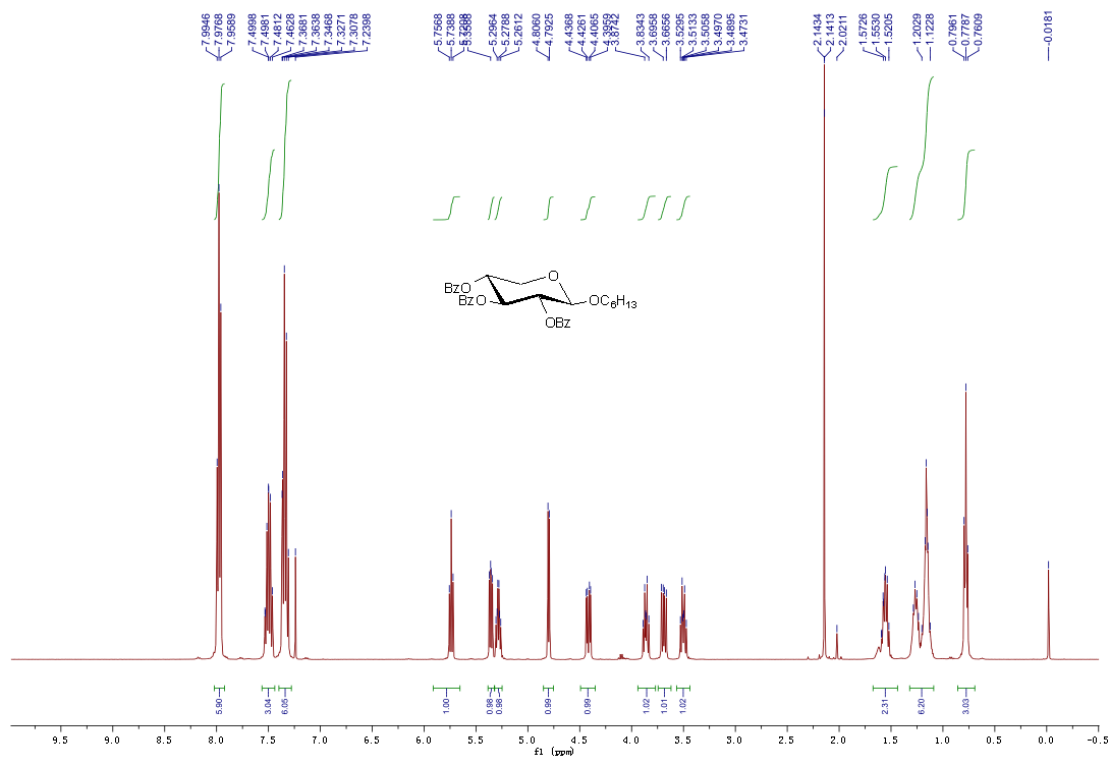

Figure S1. <sup>1</sup>H NMR spectrum (400 MHz) of compound **8a** in CDCl<sub>3</sub>.

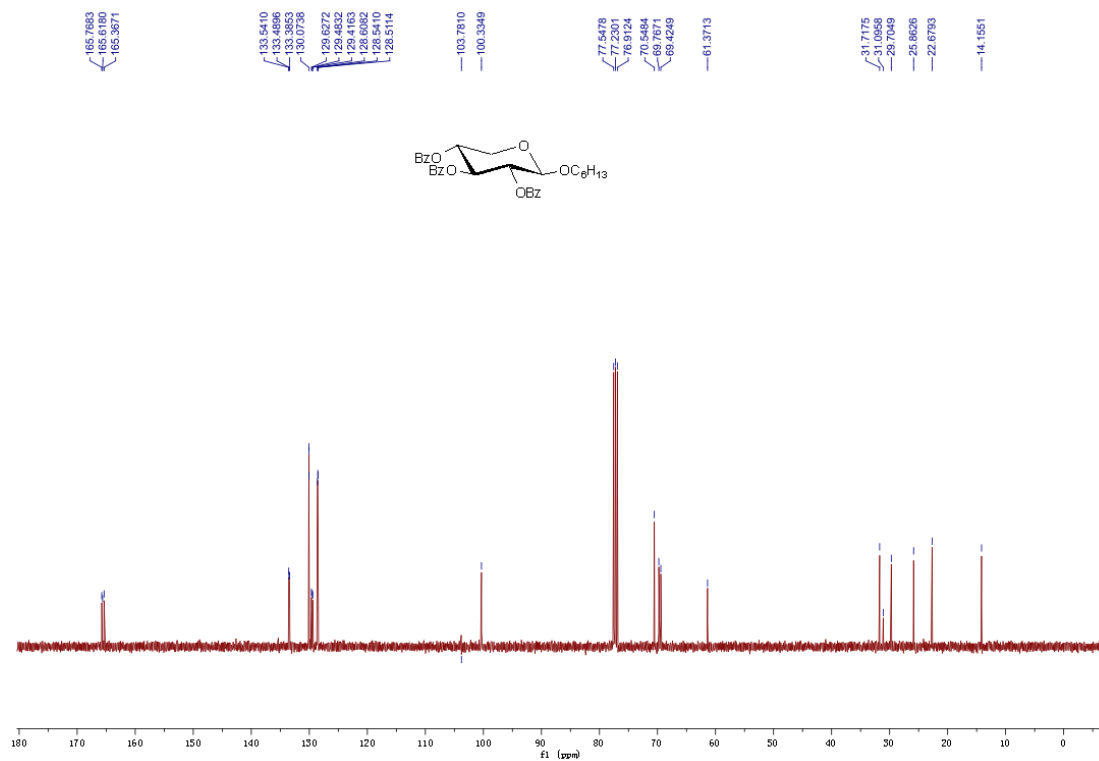

Figure S2. <sup>13</sup>C NMR spectrum (100 MHz) of compound **8a** in CDCl<sub>3</sub>.

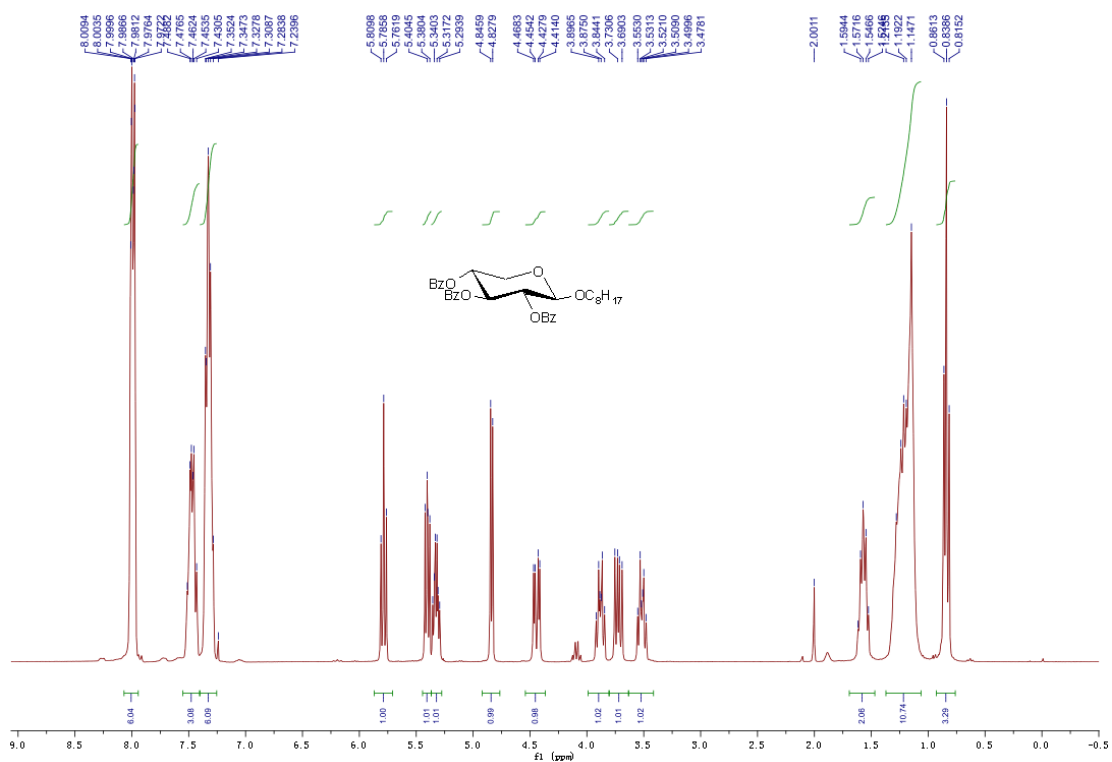

Figure S3. <sup>1</sup>H NMR spectrum (300 MHz) of compound **8b** in CDCl<sub>3</sub>.

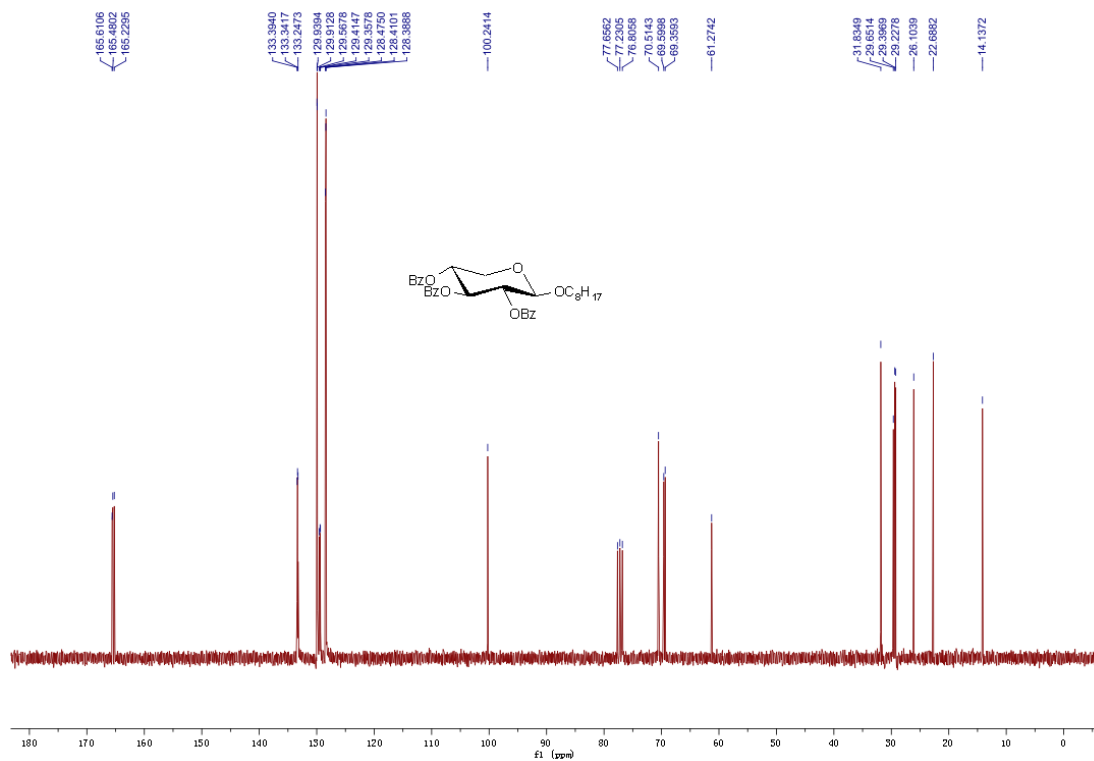

Figure S4. <sup>13</sup>C NMR spectrum (75 MHz) of compound **8b** in CDCl<sub>3</sub>.

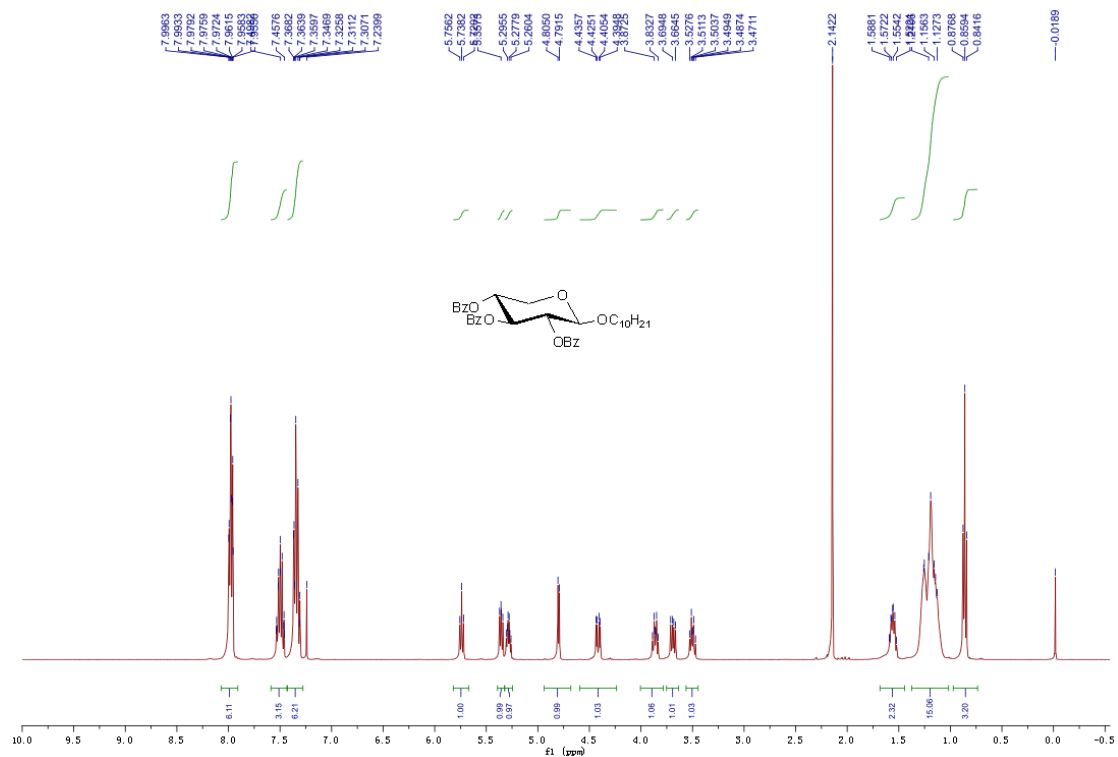

Figure S5. <sup>1</sup>H NMR spectrum (400 MHz) of compound **8c** in CDCl<sub>3</sub>.

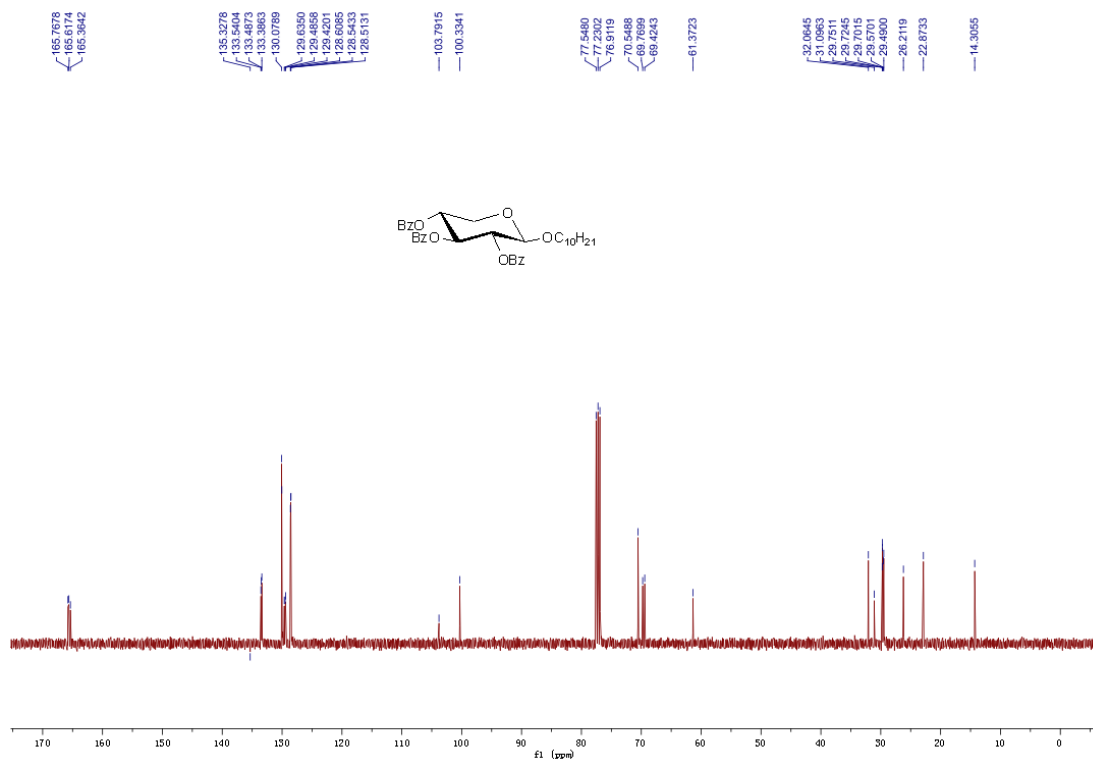

Figure S6. <sup>13</sup>C NMR spectrum (100 MHz) of compound **8c** in CDCl<sub>3</sub>.

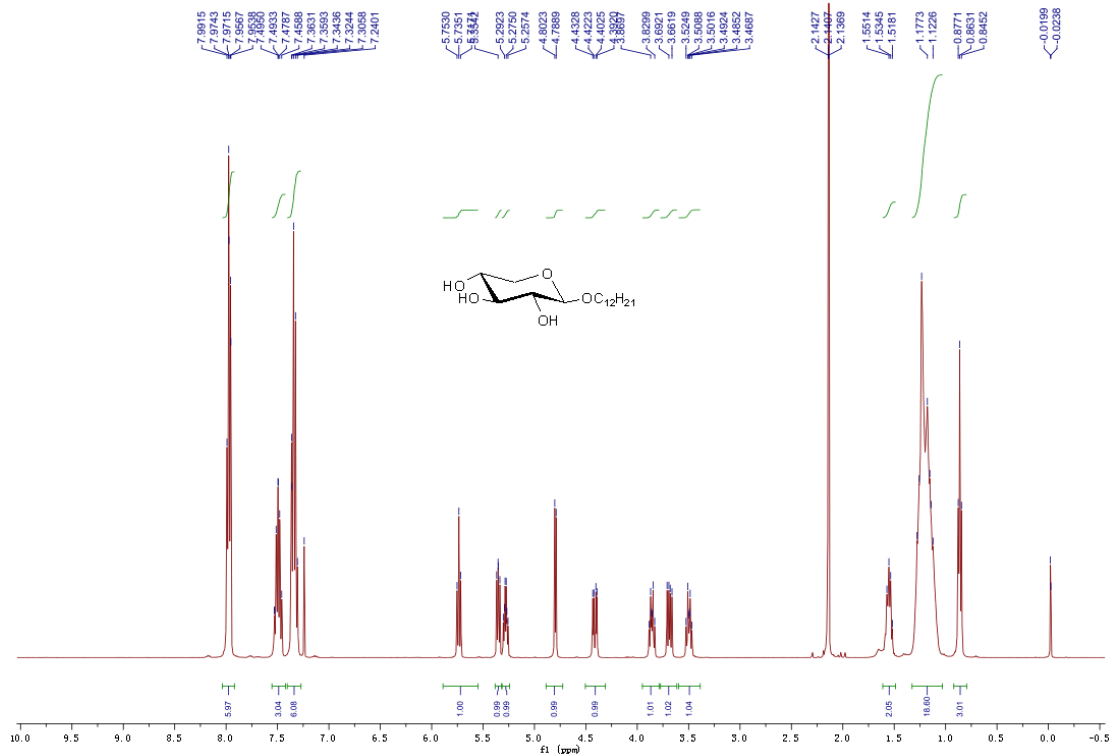

Figure S7.  $^1\text{H}$  NMR spectrum (400 MHz) of compound **8d** in  $\text{CDCl}_3$ .

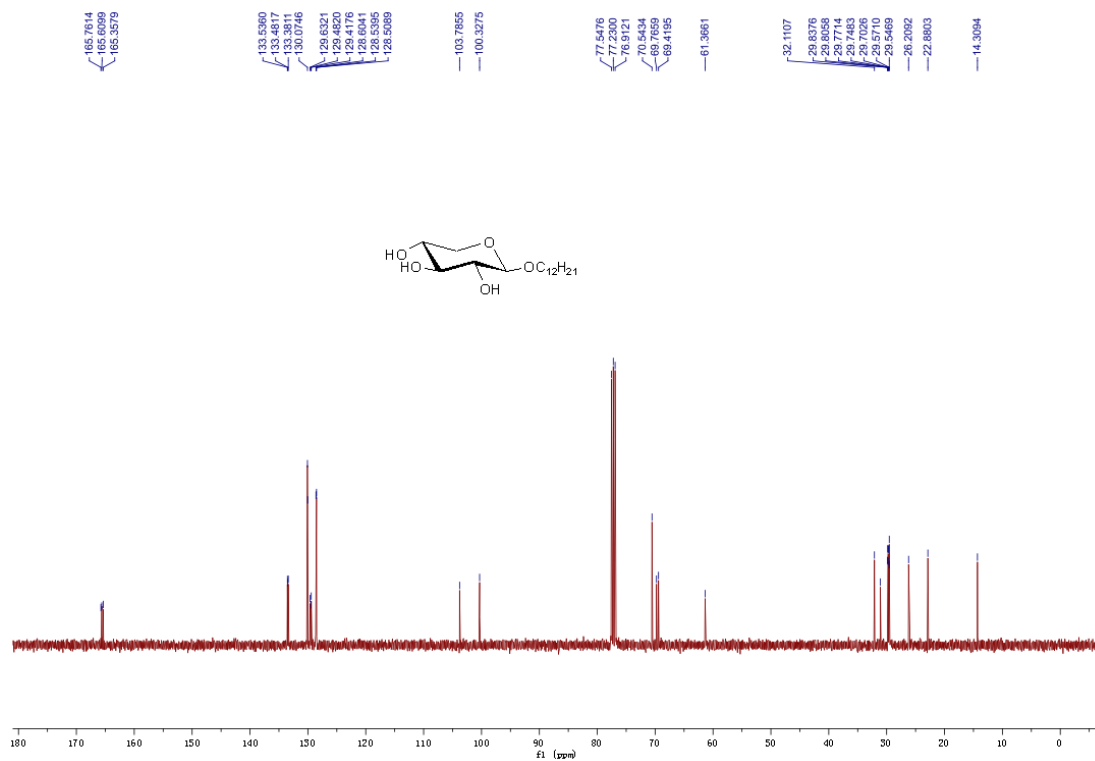

Figure S8.  $^{13}\text{C}$  NMR spectrum (100 MHz) of compound **8d** in  $\text{CDCl}_3$ .

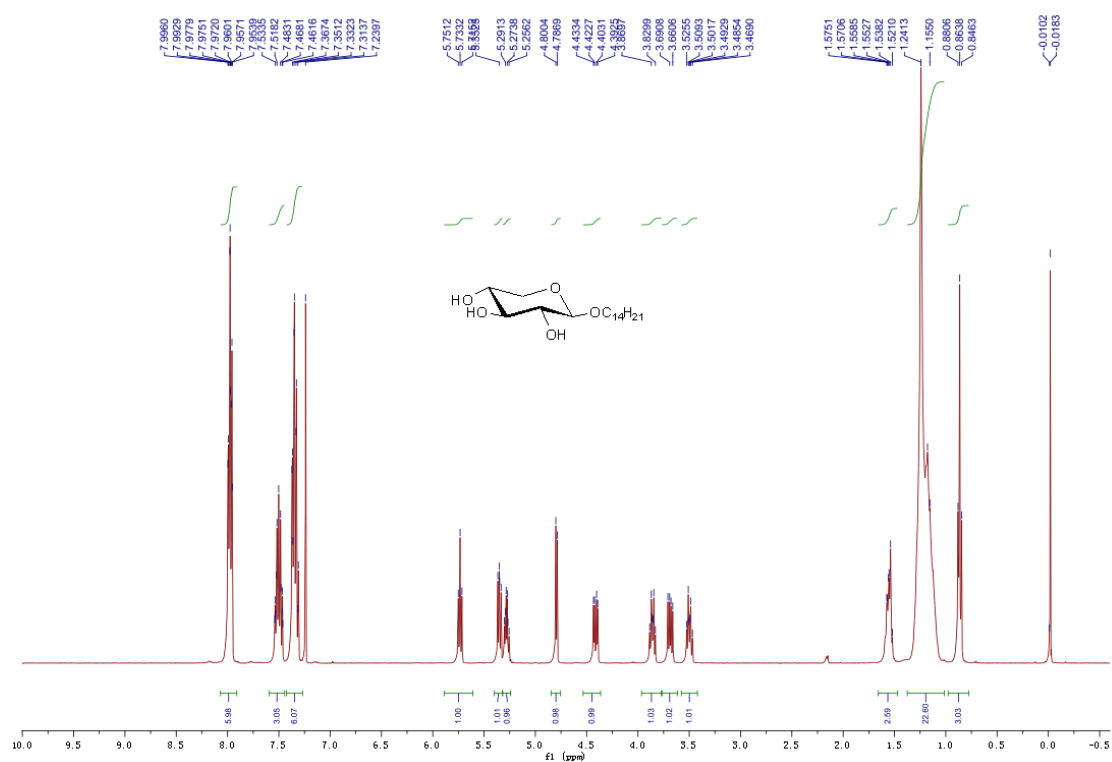

Figure S9.  $^1\text{H}$  NMR spectrum (400 MHz) of compound **8e** in  $\text{CDCl}_3$ .

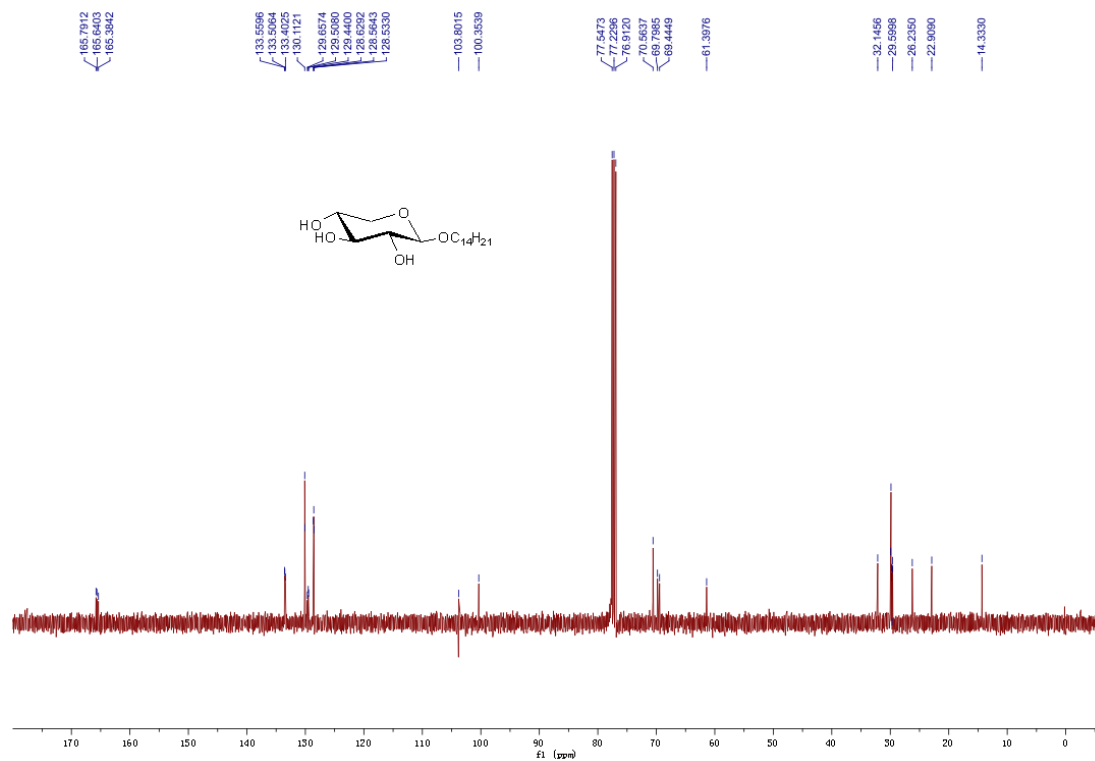

Figure S10.  $^{13}\text{C}$  NMR spectrum (100 MHz) of compound **8e** in  $\text{CDCl}_3$ .



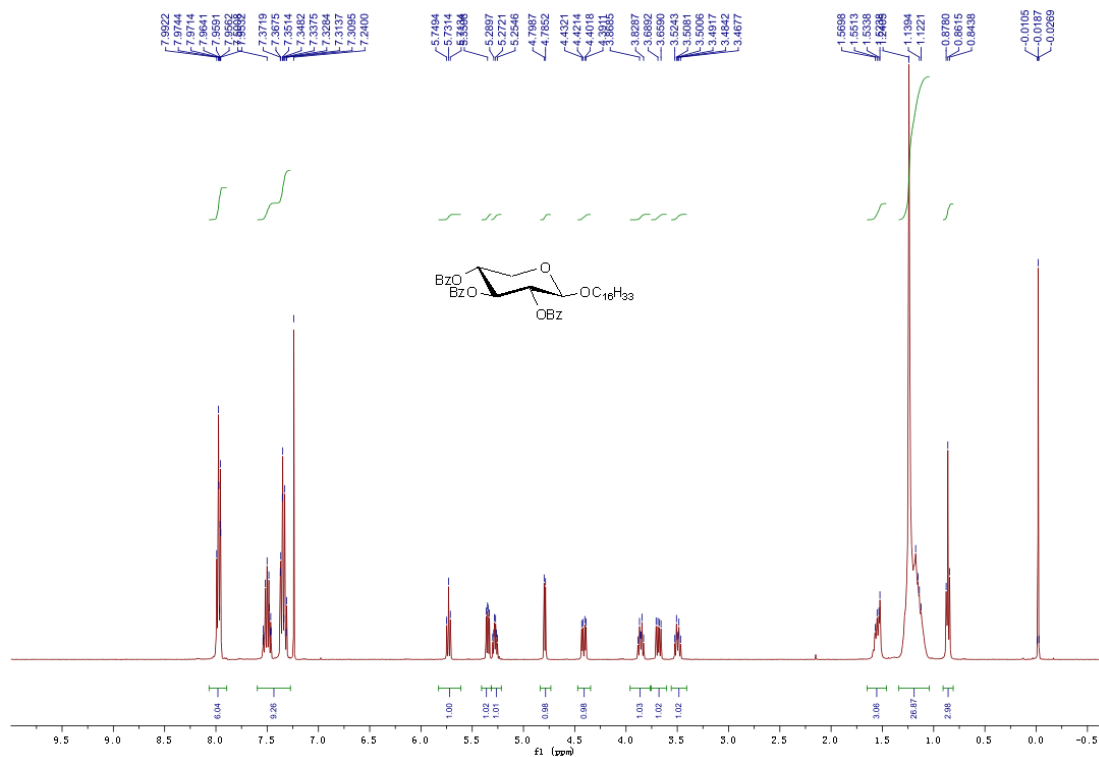

Figure S11.  $^1\text{H}$  NMR spectrum (400 MHz) of compound **8f** in  $\text{CDCl}_3$ .

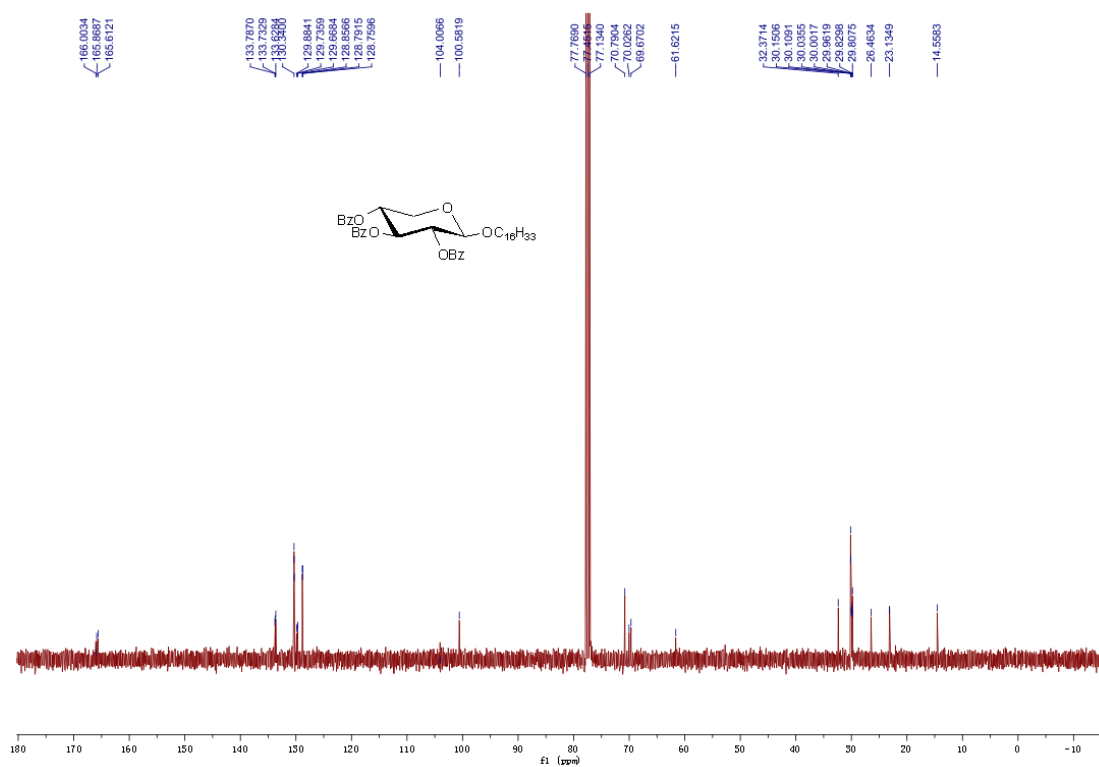

Figure S12.  $^{13}\text{C}$  NMR spectrum (100 MHz) of compound **8f** in  $\text{CDCl}_3$ .

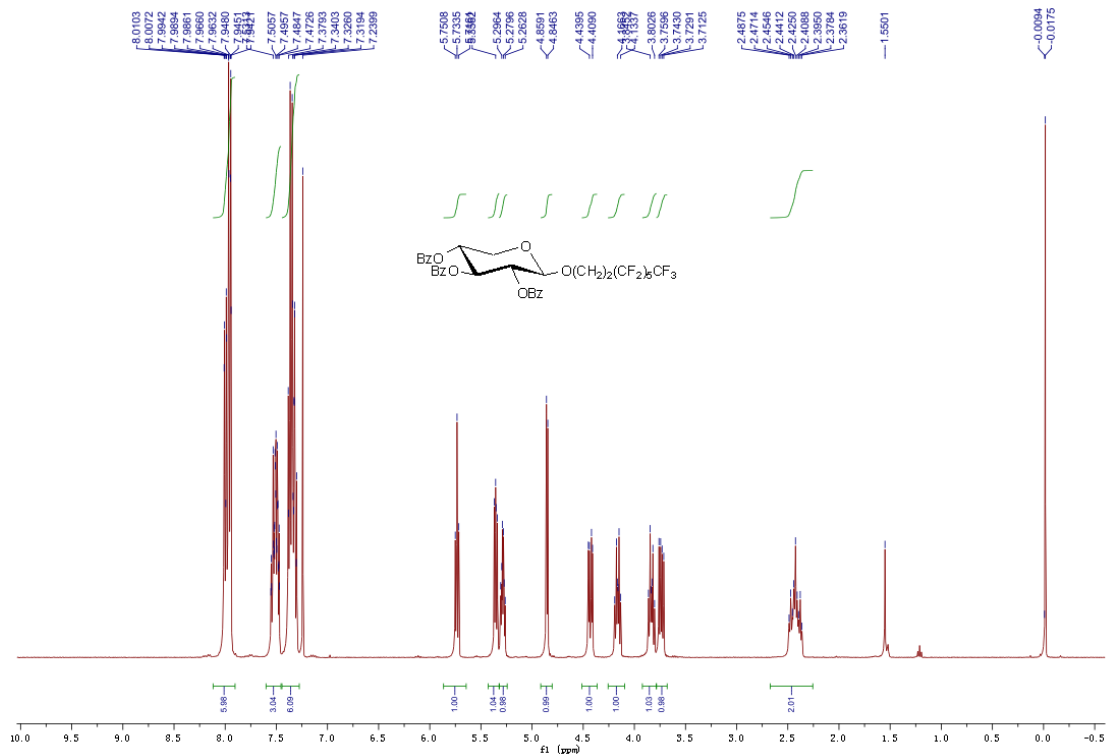

Figure S13. <sup>1</sup>H NMR spectrum (400 MHz) of compound **8g** in CDCl<sub>3</sub>.

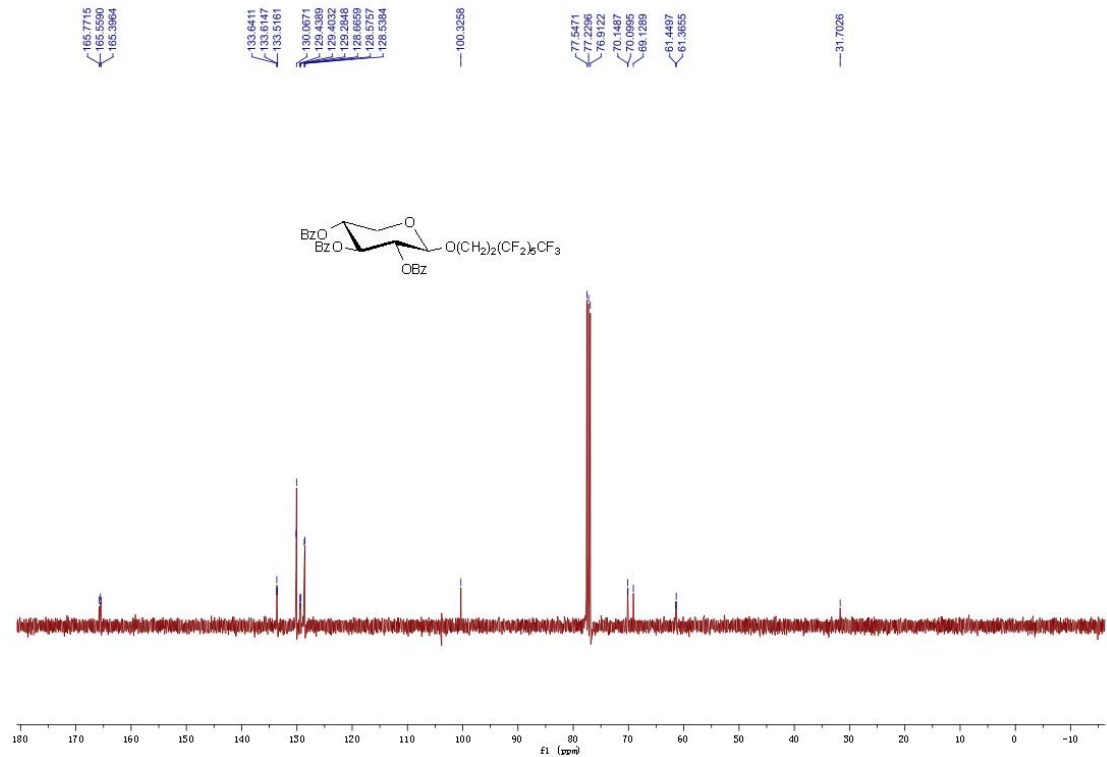

Figure S14. <sup>13</sup>C NMR spectrum (100 MHz) of compound **8g** in CDCl<sub>3</sub>.

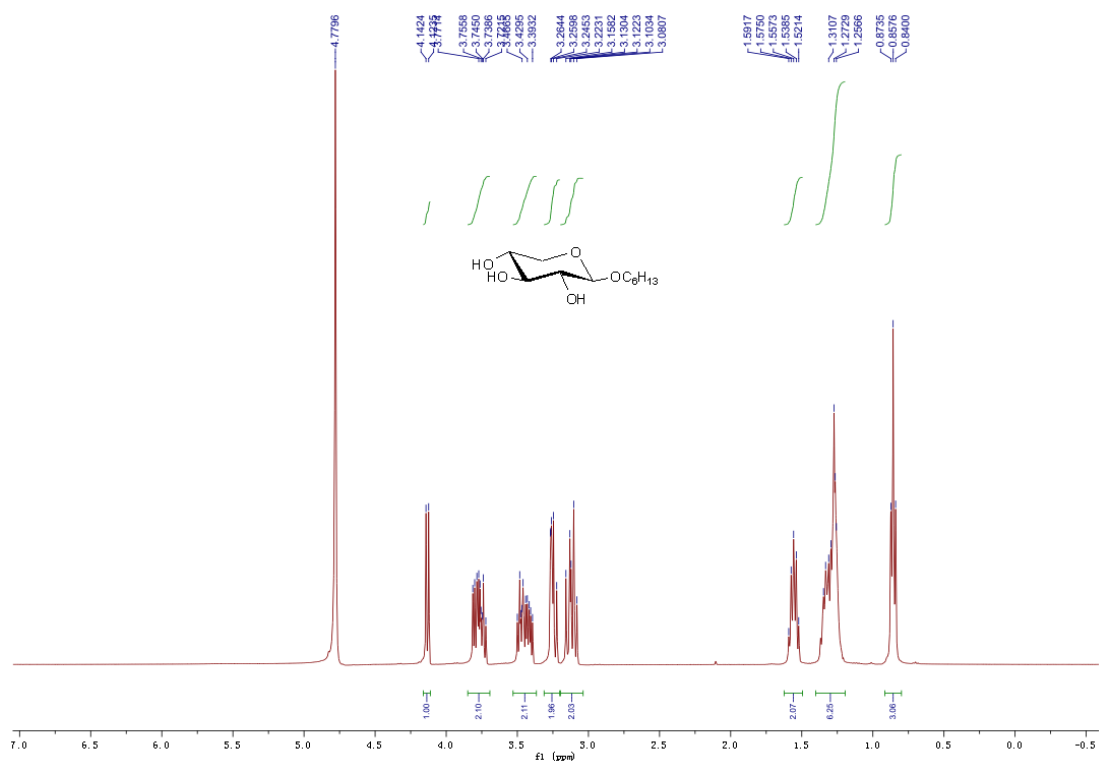

Figure S15.  $^1\text{H}$  NMR spectrum (400 MHz) of compound **9a** in  $\text{d}_4\text{-MeOH}$ .

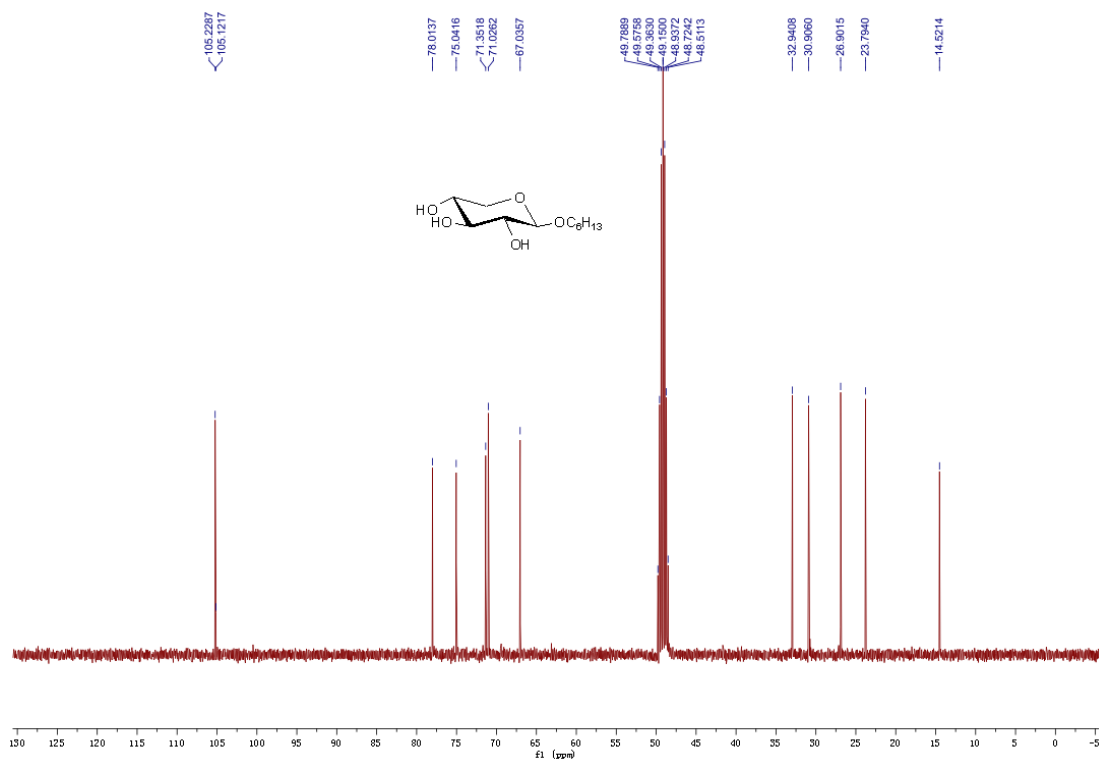

Figure S16.  $^{13}\text{C}$  NMR spectrum (400 MHz) of compound **9a** in  $\text{d}_4\text{-MeOH}$ .

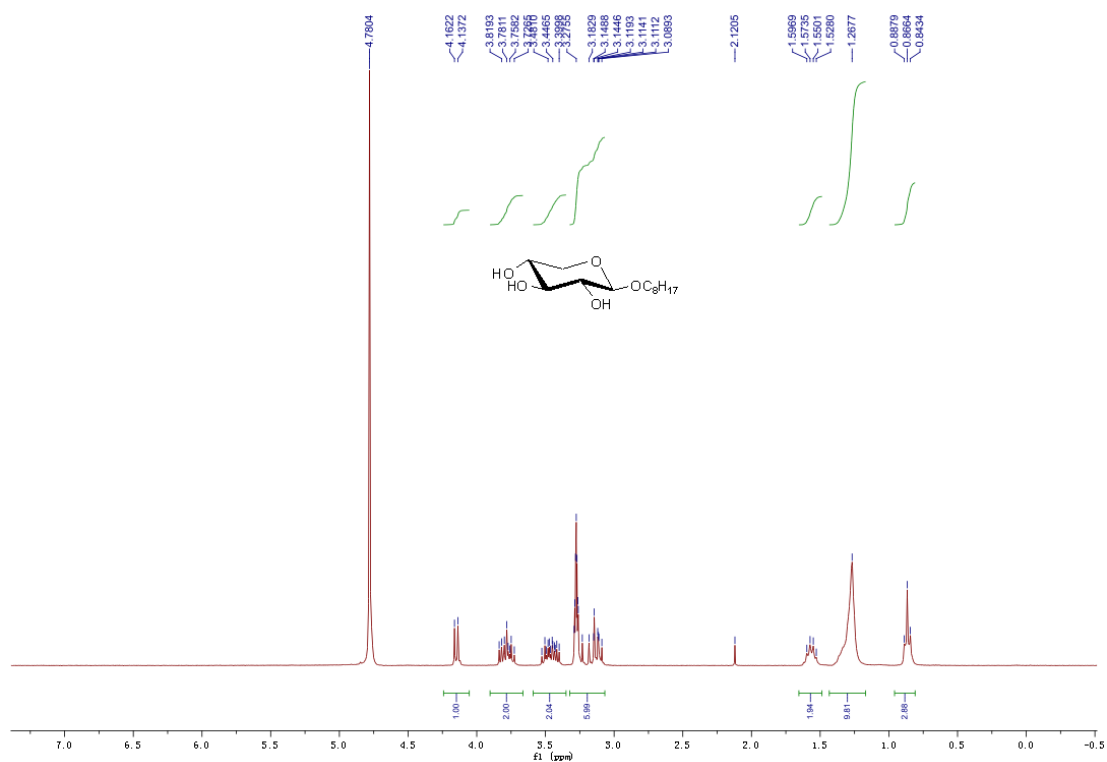

**Figure S17.** <sup>1</sup>H NMR spectrum (300 MHz) of compound **9b** in d<sub>4</sub>-MeOH.

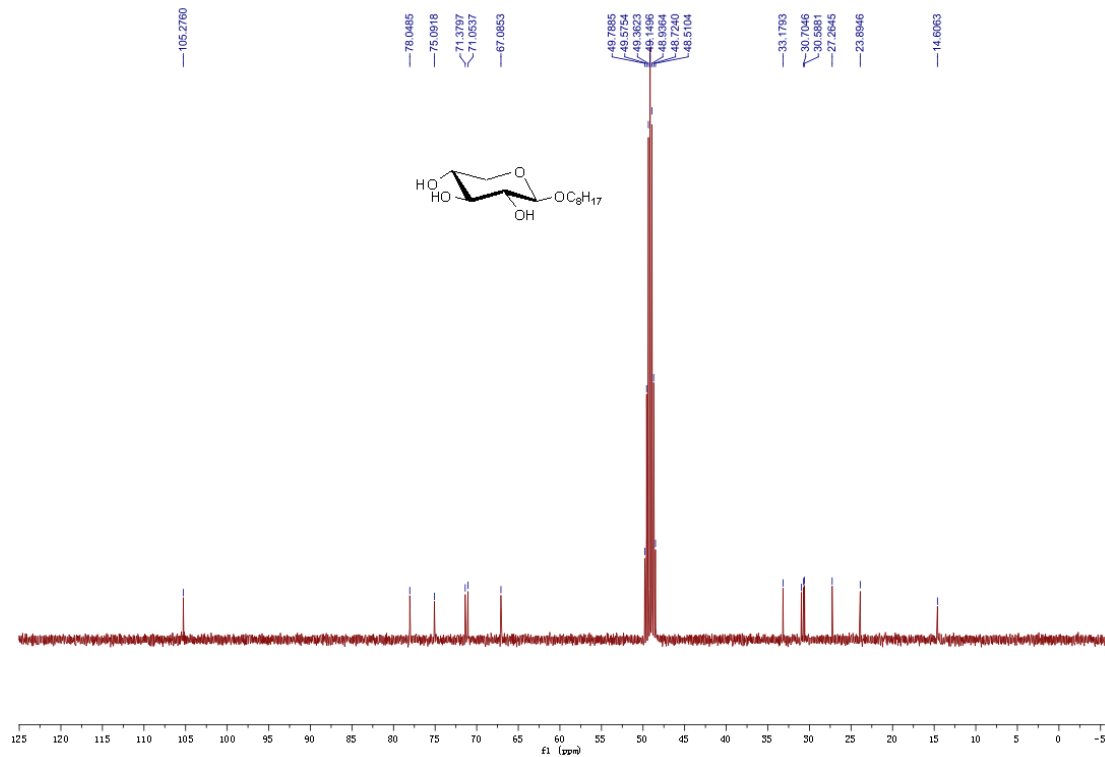

**Figure S18.** <sup>13</sup>C NMR spectrum (100 MHz) of compound **9b** in d<sub>4</sub>-MeOH.

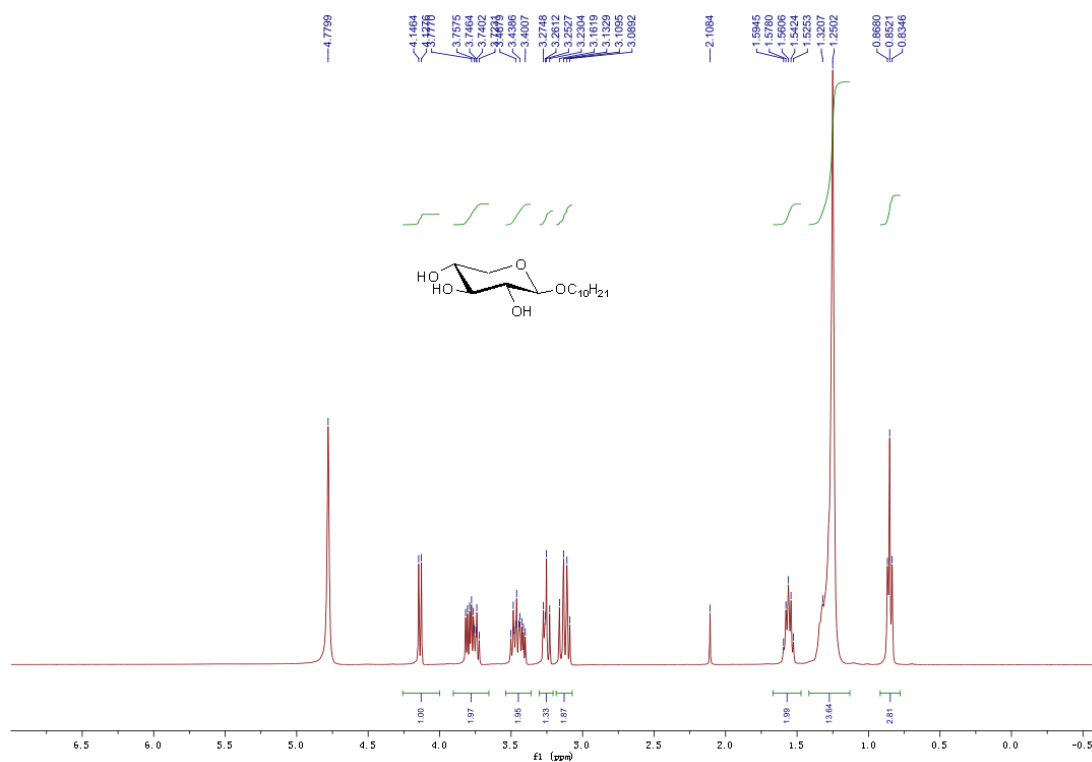

**Figure S19.** <sup>1</sup>H NMR spectrum (400 MHz) of compound **9c** in d<sub>4</sub>-MeOH.

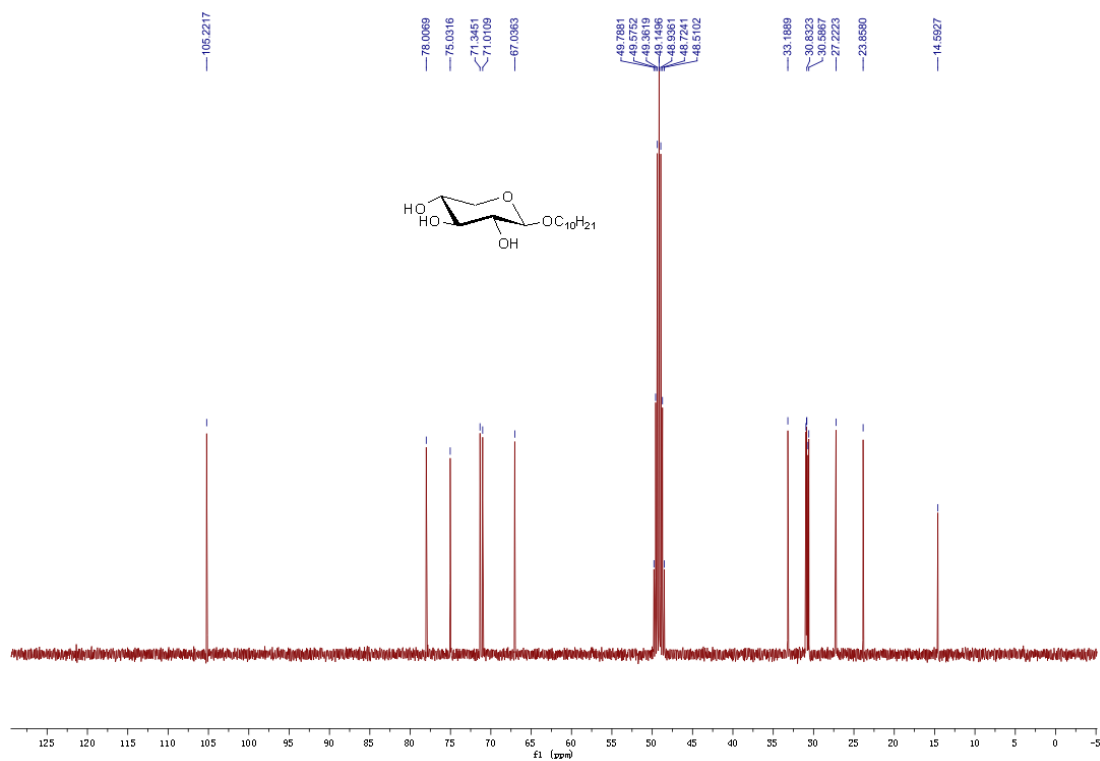

**Figure S20.** <sup>13</sup>C NMR spectrum (100 MHz) of compound **9c** in d<sub>4</sub>-MeOH.

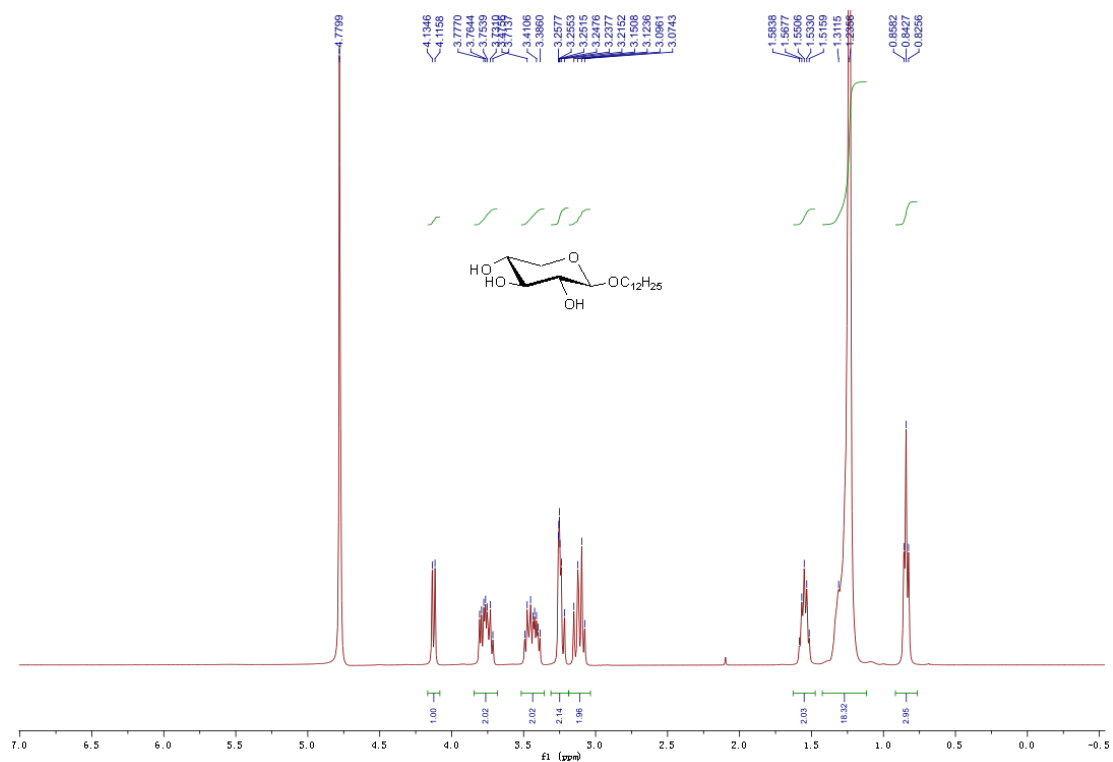

**Figure S21.**  $^1\text{H}$  NMR spectrum (400 MHz) of compound **9d** in  $\text{d}_4\text{-MeOH}$ .

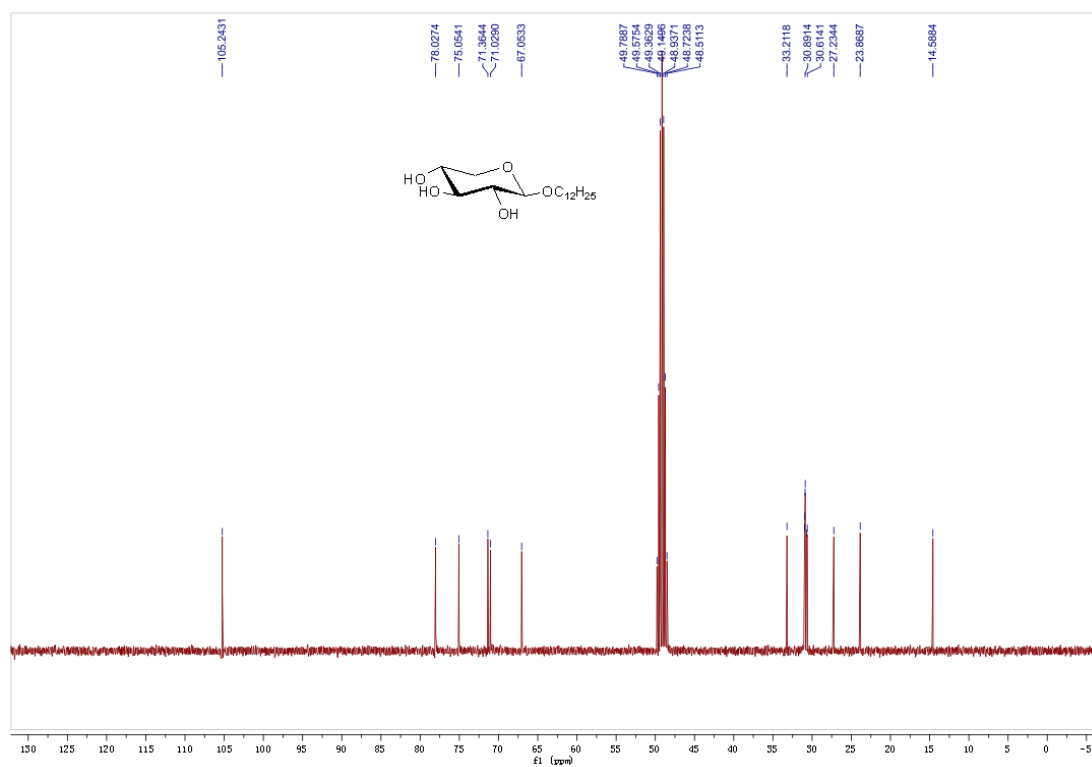

**Figure S22.**  $^{13}\text{C}$  NMR spectrum (100 MHz) of compound **9d** in  $\text{d}_4\text{-MeOH}$ .

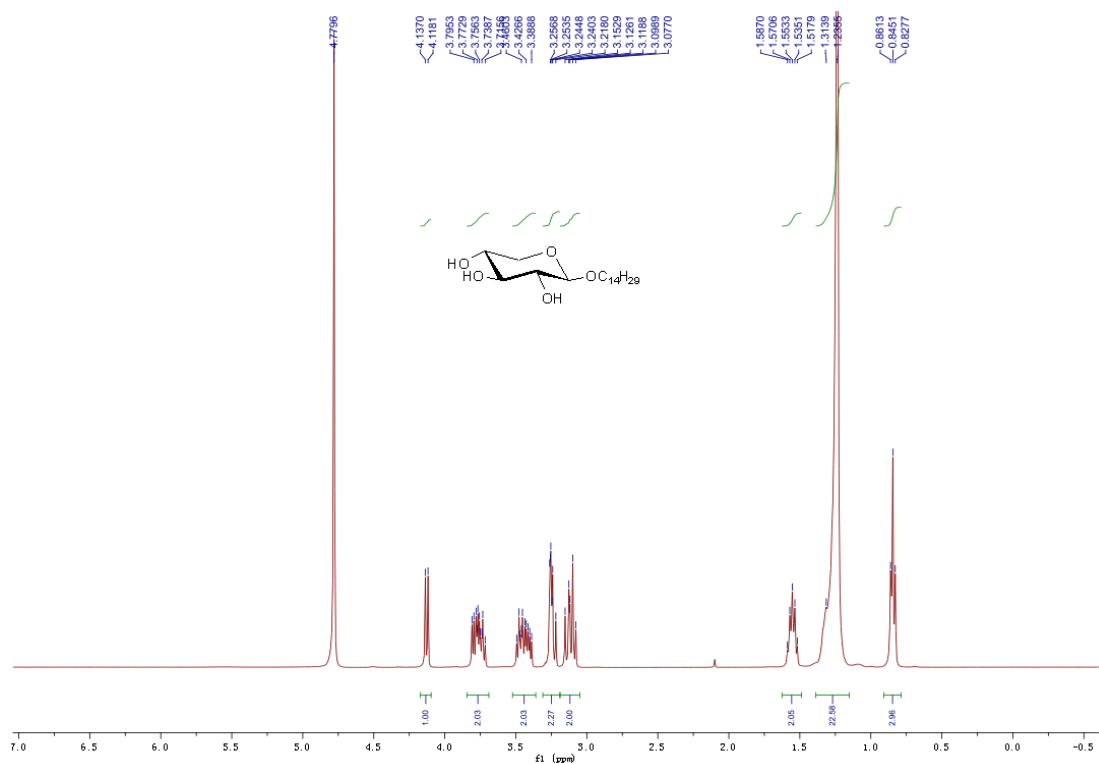

**Figure S23.**  $^1\text{H}$  NMR spectrum (400 MHz) of compound **9e** in  $\text{d}_4\text{-MeOH}$ .

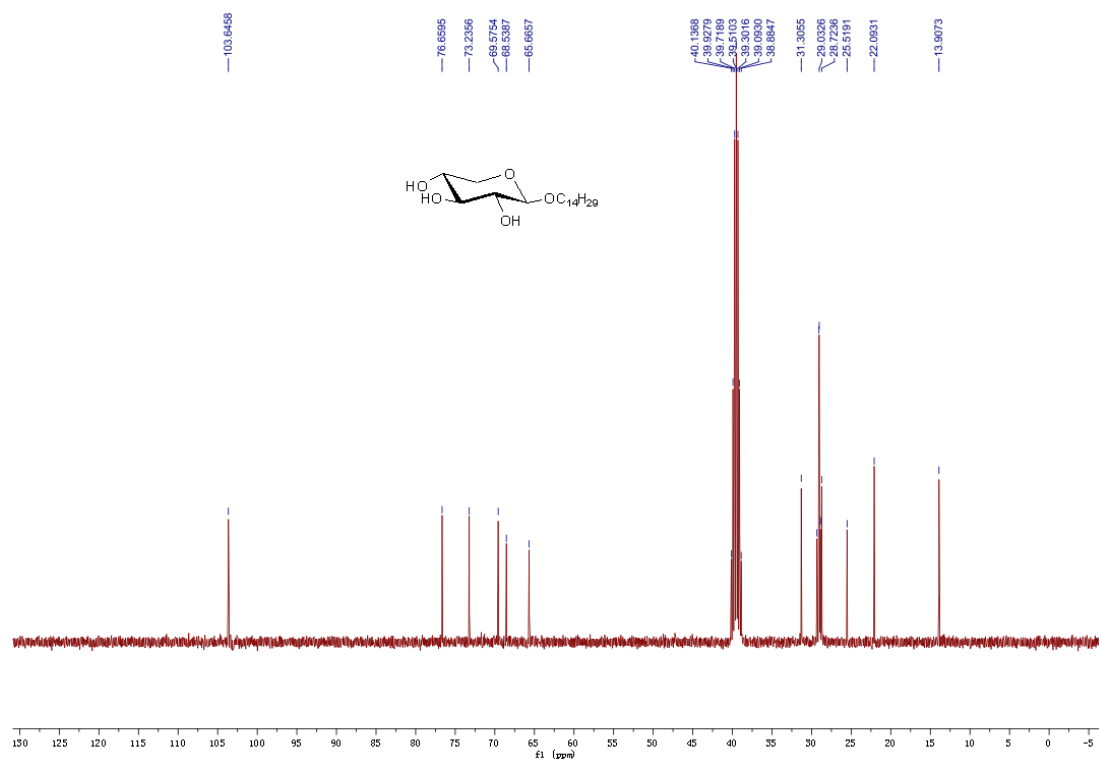

**Figure S24.**  $^{13}\text{C}$  NMR spectrum (100 MHz) of compound **9e** in  $\text{d}_4\text{-MeOH}$ .

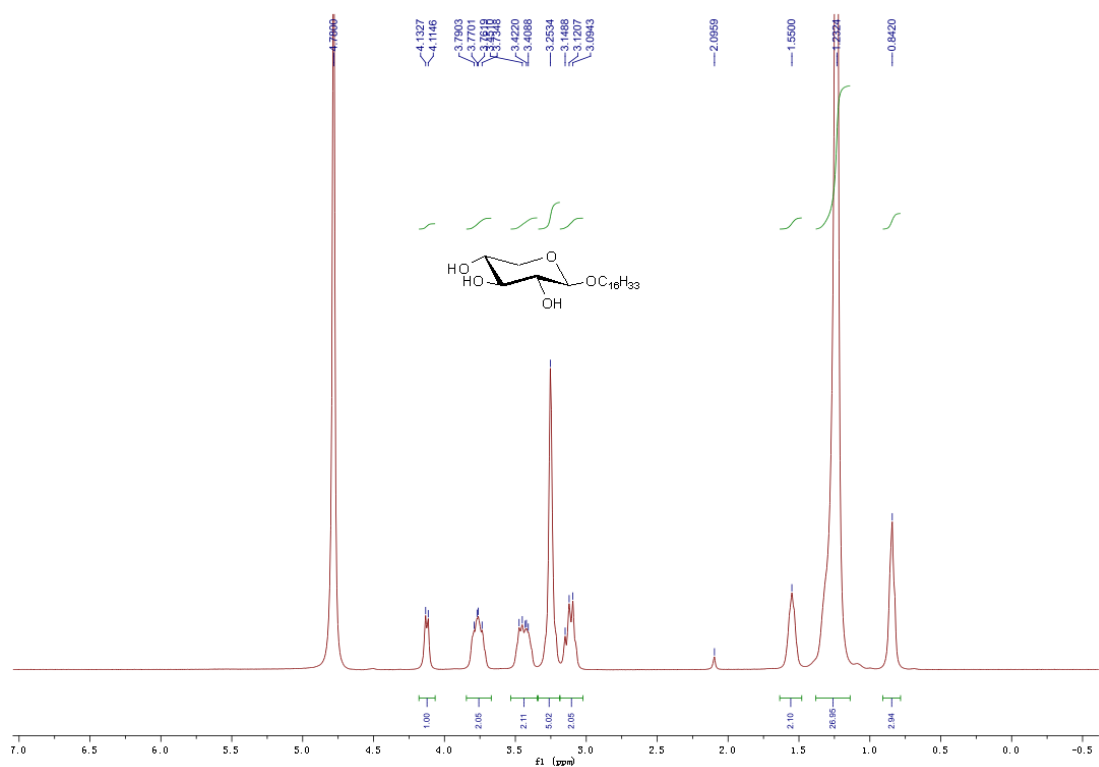

**Figure S25.**  $^1\text{H}$  NMR spectrum (400 MHz) of compound **9f** in  $\text{d}_4\text{-MeOH}$ .

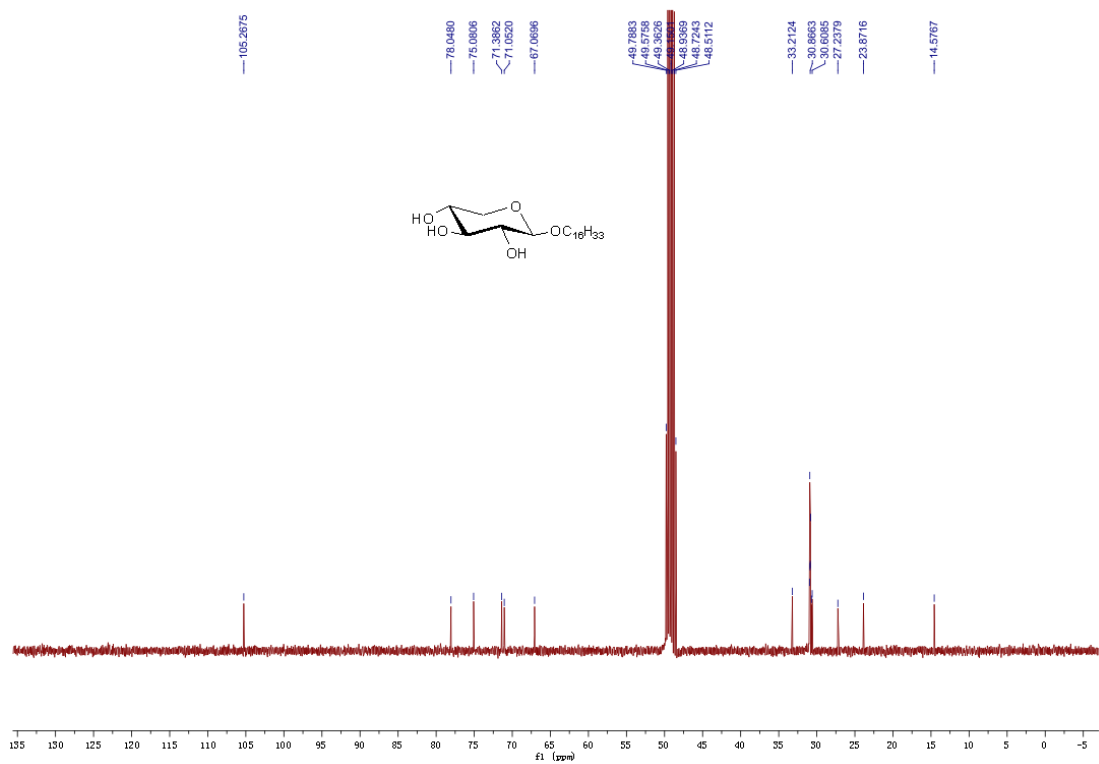

**Figure S26.**  $^{13}\text{C}$  NMR spectrum (100 MHz) of compound **9f** in  $\text{d}_4\text{-MeOH}$ .



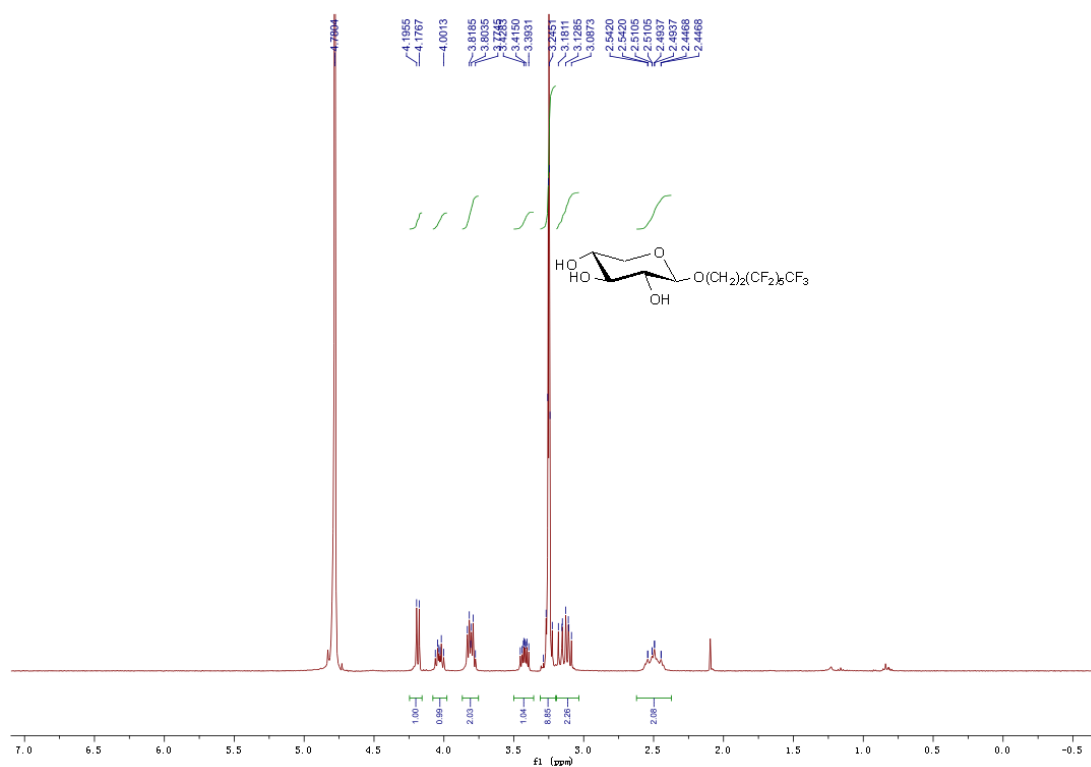

Figure S27.  $^1\text{H}$  NMR spectrum (400 MHz) of compound **9g** in  $\text{d}_4\text{-MeOH}$ .

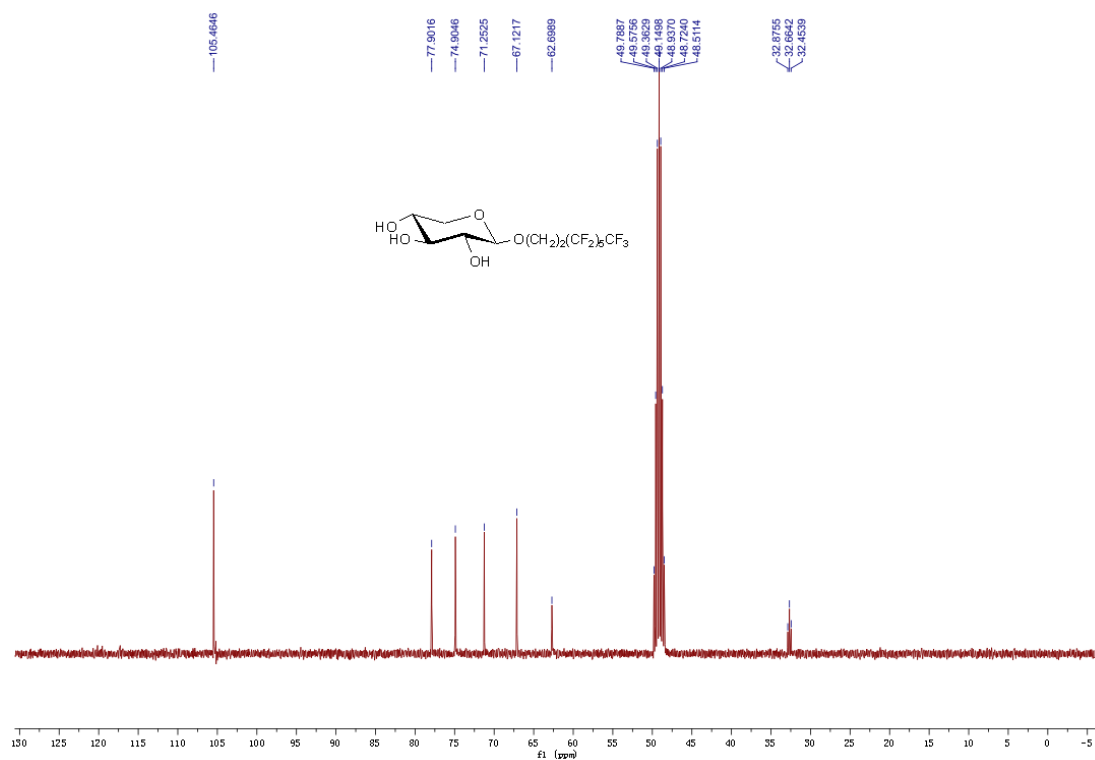

Figure S28.  $^{13}\text{C}$  NMR spectrum (100 MHz) of compound **9g** in  $\text{d}_4\text{-MeOH}$ .

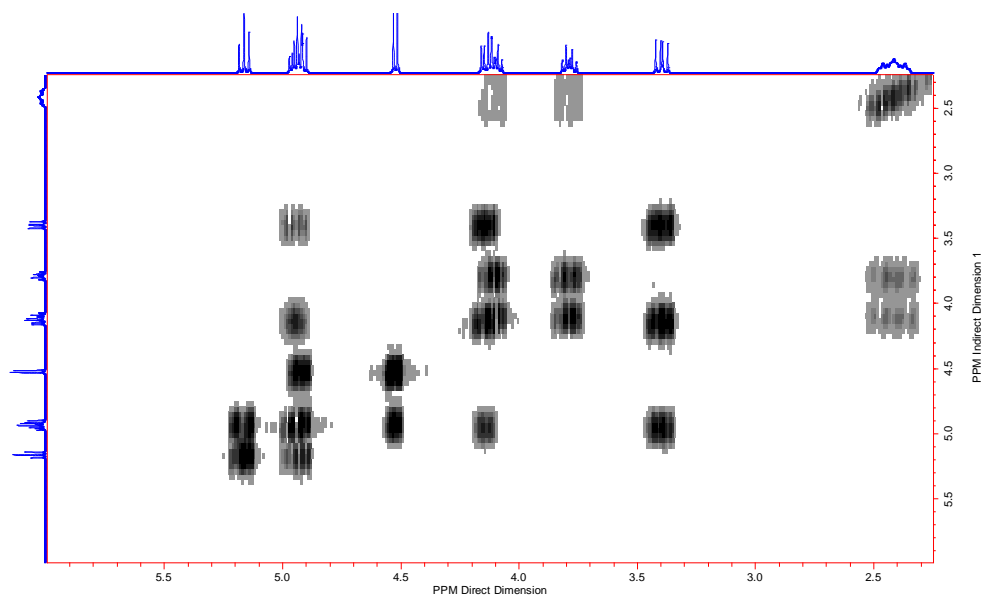

**Figure S29.** COSY spectrum of **10** in  $\text{CDCl}_3$

**Table S1.** Crystal data and structure refinement for decyl  $\beta$ -D-xylopyranoside **9c**.

---

|                                                              |                                                             |
|--------------------------------------------------------------|-------------------------------------------------------------|
| Empirical formula                                            | C <sub>15</sub> H <sub>30</sub> O <sub>5</sub>              |
| Formula weight                                               | 290.40                                                      |
| Temperature                                                  | 90.0(2) K                                                   |
| Wavelength                                                   | 0.71070 Å                                                   |
| Crystal system                                               | Monoclinic                                                  |
| Space group                                                  | C2                                                          |
| Unit cell dimensions:                                        |                                                             |
| <i>A</i>                                                     | 13.2154(6) Å                                                |
| <i>B</i>                                                     | 4.3040(2) Å                                                 |
| <i>C</i>                                                     | 29.9491(16) Å                                               |
| Volume                                                       | 1662.03(14) Å <sup>3</sup>                                  |
| Z, calculated density                                        | 2, 1.197 mg/m <sup>3</sup>                                  |
| Absorption coefficient                                       | 0.089 mm <sup>-1</sup>                                      |
| <i>F</i> (000)                                               | 660                                                         |
| Crystal size                                                 | 0.3×0.3×0.04 mm                                             |
| Theta range for data collection                              | 2.09- 27.41°                                                |
| Limiting indices                                             | -16 < <i>h</i> < 16, -5 < <i>k</i> < 5, -38 < <i>l</i> < 38 |
| Reflections collected/unique                                 | 2131/ 1625 [ <i>R</i> (int) = 0.0535]                       |
| Completeness to $\theta = 27.41$                             | 99.5%                                                       |
| Absorption correction                                        | Semi-empirical from equivalents                             |
| Refinement method                                            | Full-matrix least-squares on <i>F</i> <sup>2</sup>          |
| Data/restraints/parameters                                   | 2131/1/193                                                  |
| Goodness-of-fit on <i>F</i> <sup>2</sup>                     | 1.017                                                       |
| Final <i>R</i> indices [ <i>I</i> > 2 $\Sigma$ ( <i>I</i> )] | <i>R</i> 1 = 0.0479, <i>wR</i> 2 = 0.0990                   |
| <i>R</i> indices (all data)                                  | <i>R</i> 1 = 0.0738, <i>wR</i> 2 = 0.1127                   |
| Largest diff. peak and hole                                  | 0.275 and -0.206 e Å <sup>-3</sup>                          |

---

**Table S2.** Selected bond lengths and angles for decyl  $\beta$ -D-xylopyranoside **9c**.

| Atoms  | Bond lengths (Å) | Atoms     | Bond angles (°) |
|--------|------------------|-----------|-----------------|
| O1-C5  | 1.432(3)         | O1- C5-C4 | 109.8(2)        |
| C1-C2  | 1.505(4)         | O5- C5-O1 | 108.5(2)        |
| O2-C2  | 1.425(3)         | O5-C5-C4  | 107.8(2)        |
| C2-C3  | 1.519(3)         | C1-O1-C5  | 110.3(2)        |
| O3-C3  | 1.432(3)         | O1-C1-C2  | 110.8(2)        |
| C3-C4  | 1.506(3)         | O2-C2-C1  | 108.0(2)        |
| O4-C4  | 1.422(3)         | O2- C2-C3 | 109.2(2)        |
| C4 -C5 | 1.515(4)         | C1-C2-C3  | 110.4(2)        |
| O5-C5  | 1.385(3)         | O3-C3 C4  | 109.1(2)        |
| O5 -C6 | 1.433(3)         | O5-C6-C7  | 106.3(2)        |
| C6-C7  | 1.518(3)         | C6-C7-C8  | 114.8(2)        |
|        |                  | O3-C3-C2  | 111.2(2)        |
|        |                  | C4-C3-C2  | 112.7(2)        |
|        |                  | O4-C4-C3  | 107.7(2)        |
|        |                  | O4-C4-C5  | 110.5(2)        |
|        |                  | C3-C4-C5  | 110.1(2)        |
|        |                  | C5-O5-C6  | 115.6(2)        |

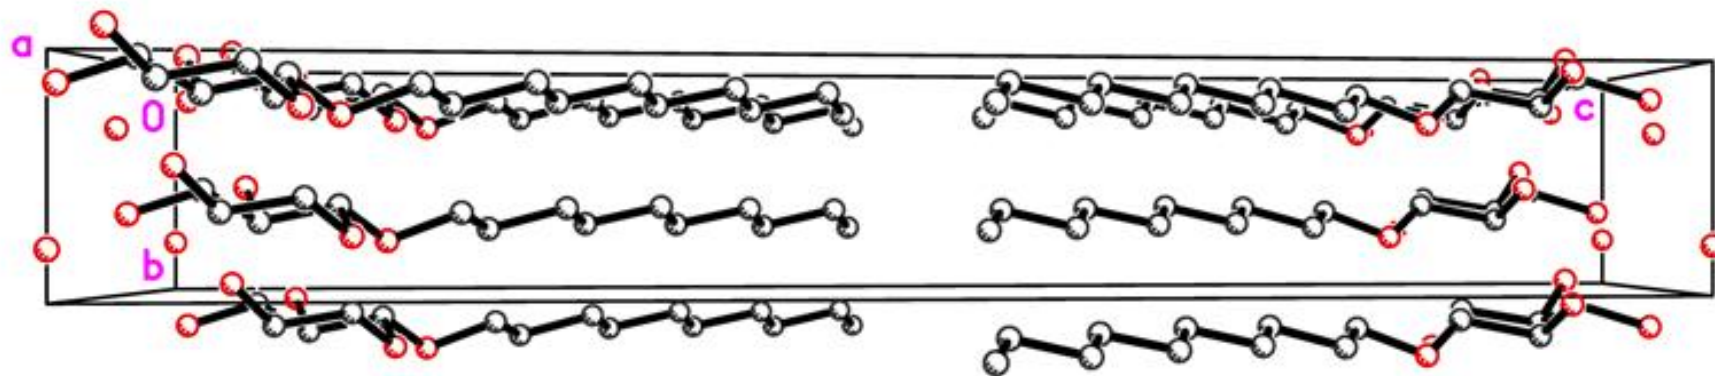

**Figure S30.** Alternating bilayers of hydrophilic xyloside groups and hydrophobic decyl groups formed parallel to the a-b plane by decyl  $\beta$ -D-xylopyranoside (**9c**).
